# Supplementary figures and images for: Selective sweeps in the Austrian Turopolje and Other Commercial Pig Populations
Source: Preprints.org preprint supplement (doi:10.20944/preprints202310.1289.v1), 2023-10-19

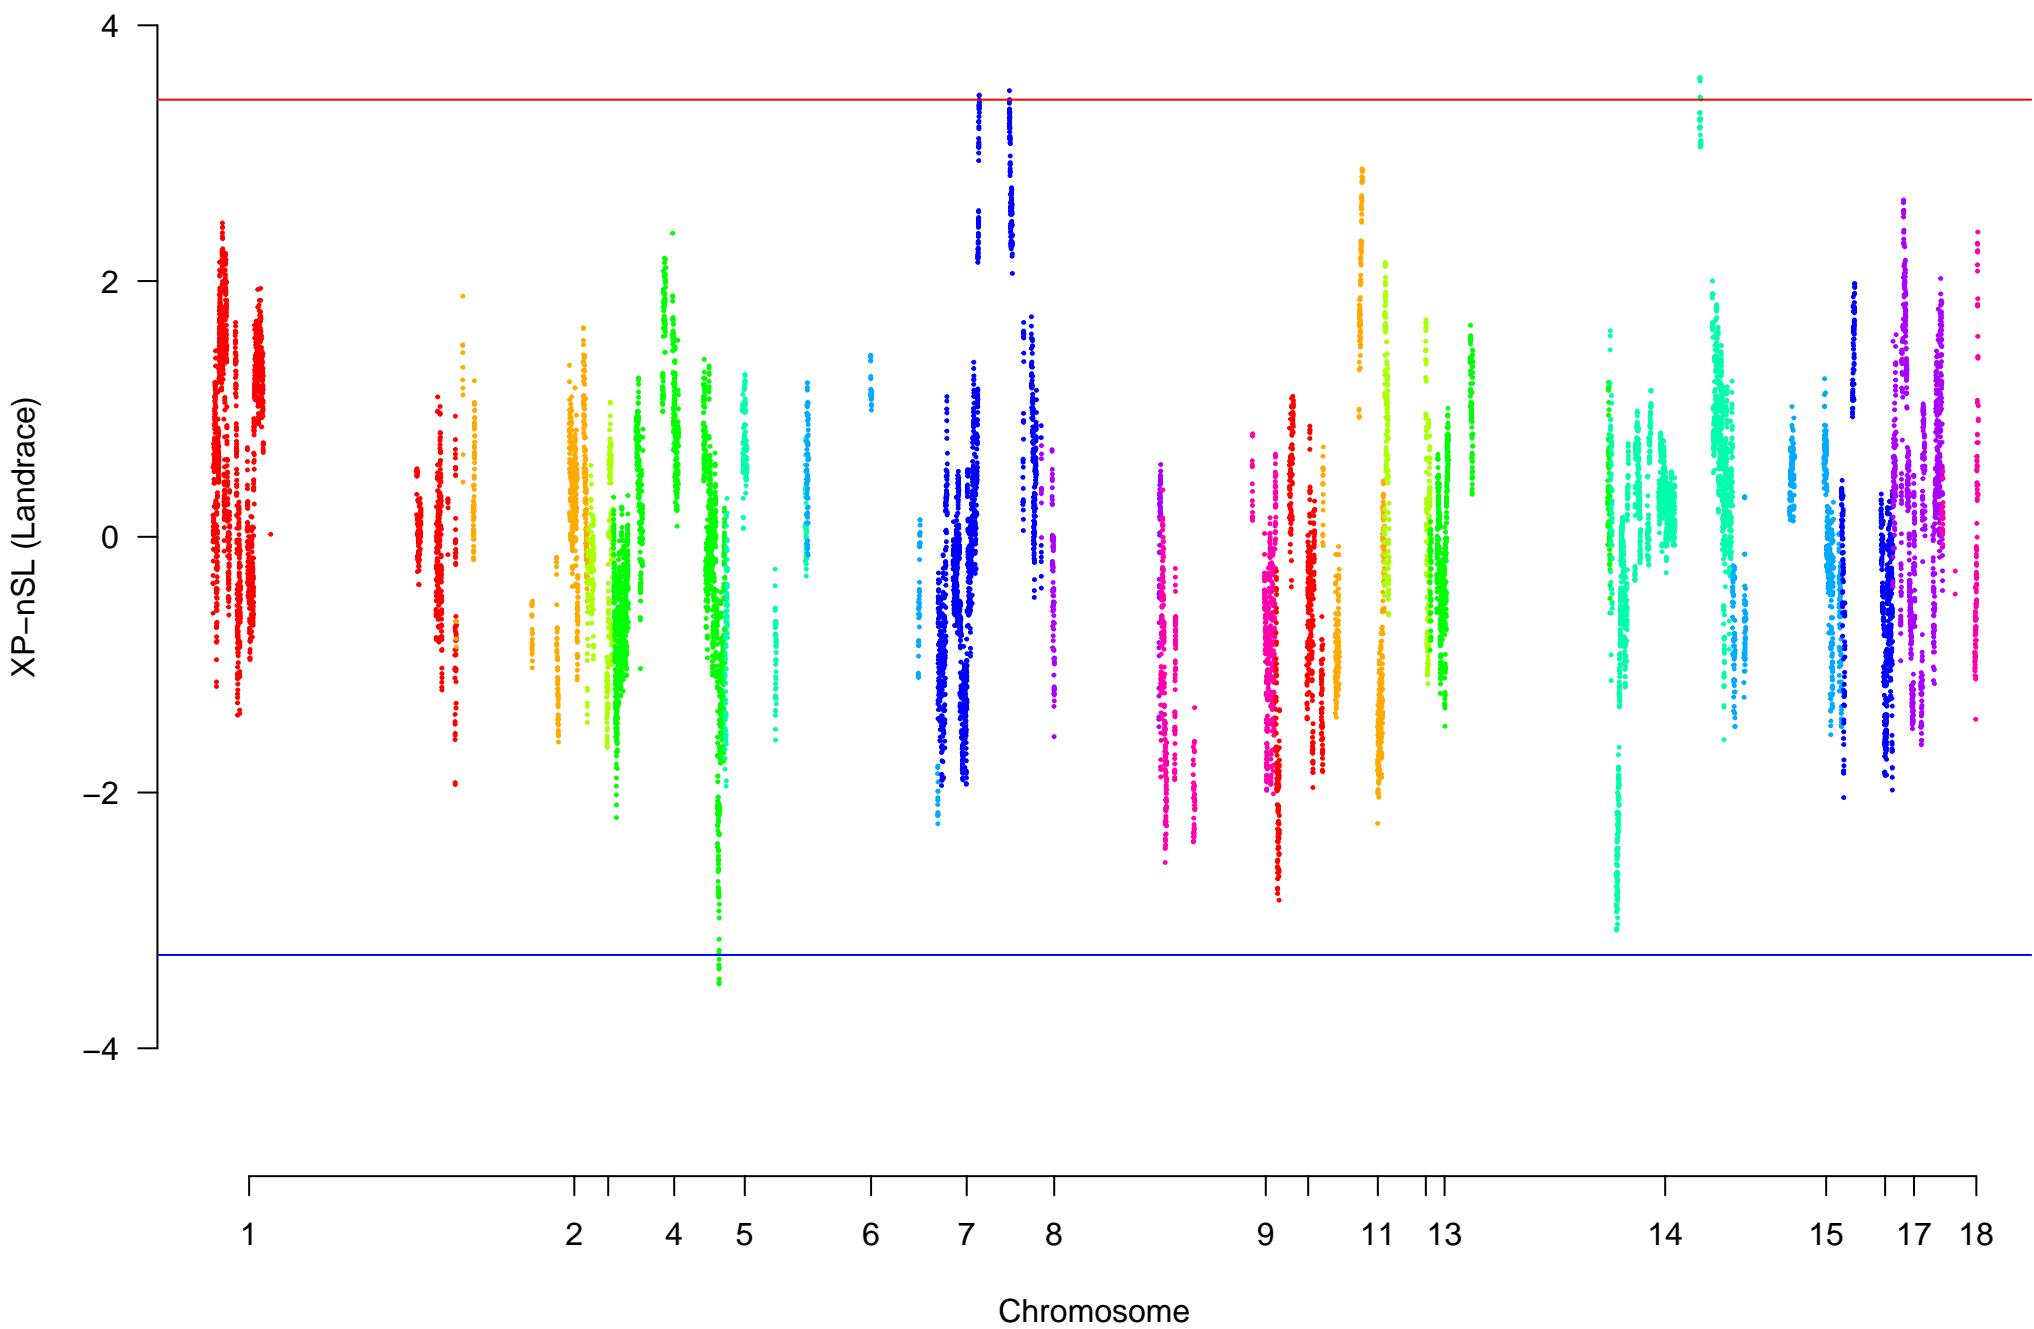

Supplement: Supplementary file 1 [file supplementary]

XP-EHH (Pietrain)

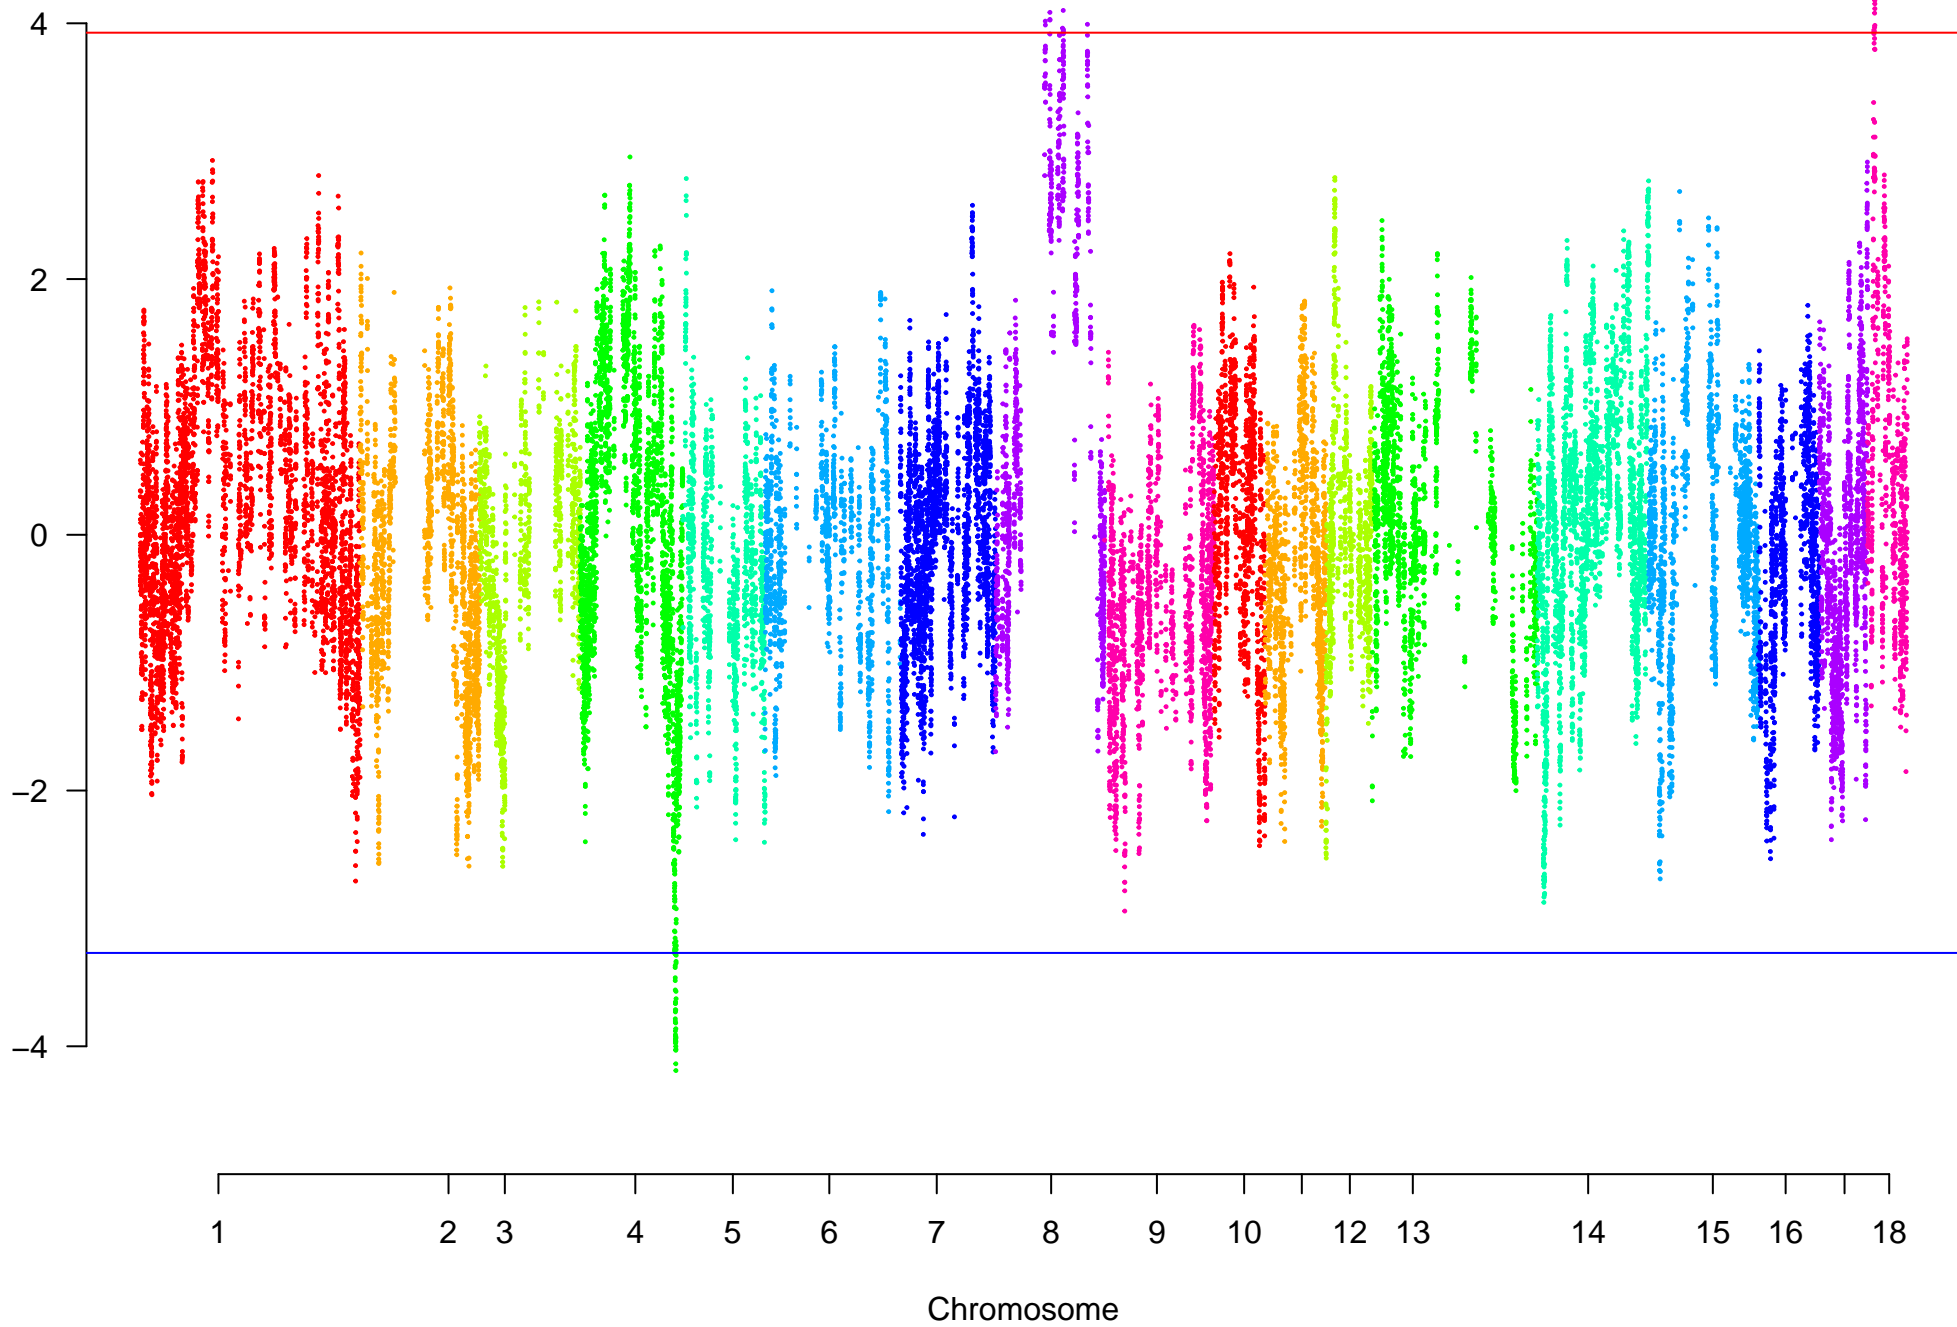

Supplement: Supplementary file 2 [file supplementary]

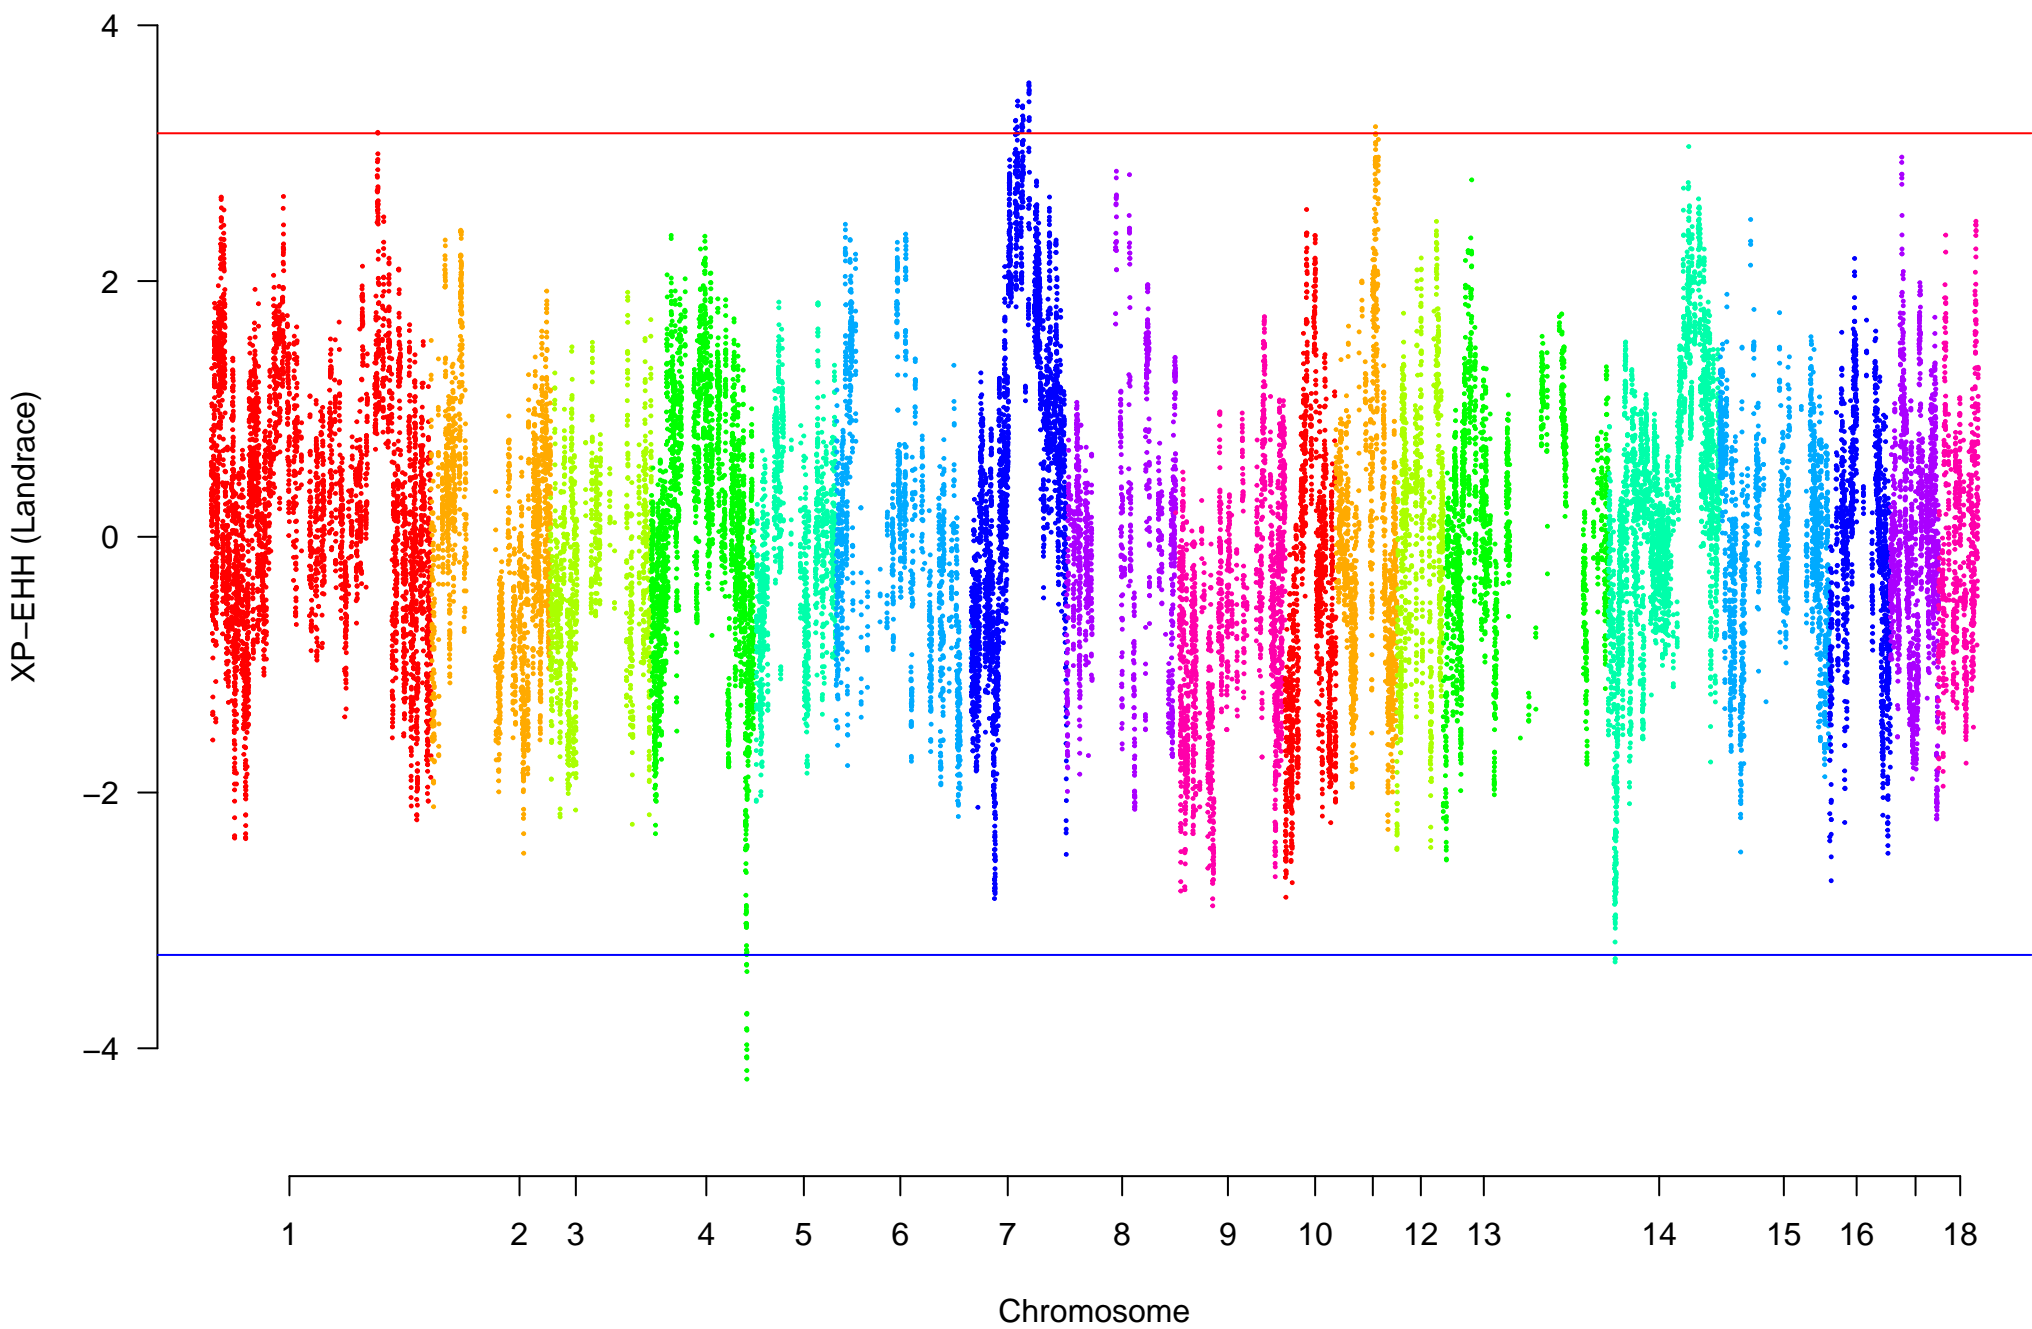

Supplement: Supplementary file 3 [file supplementary]

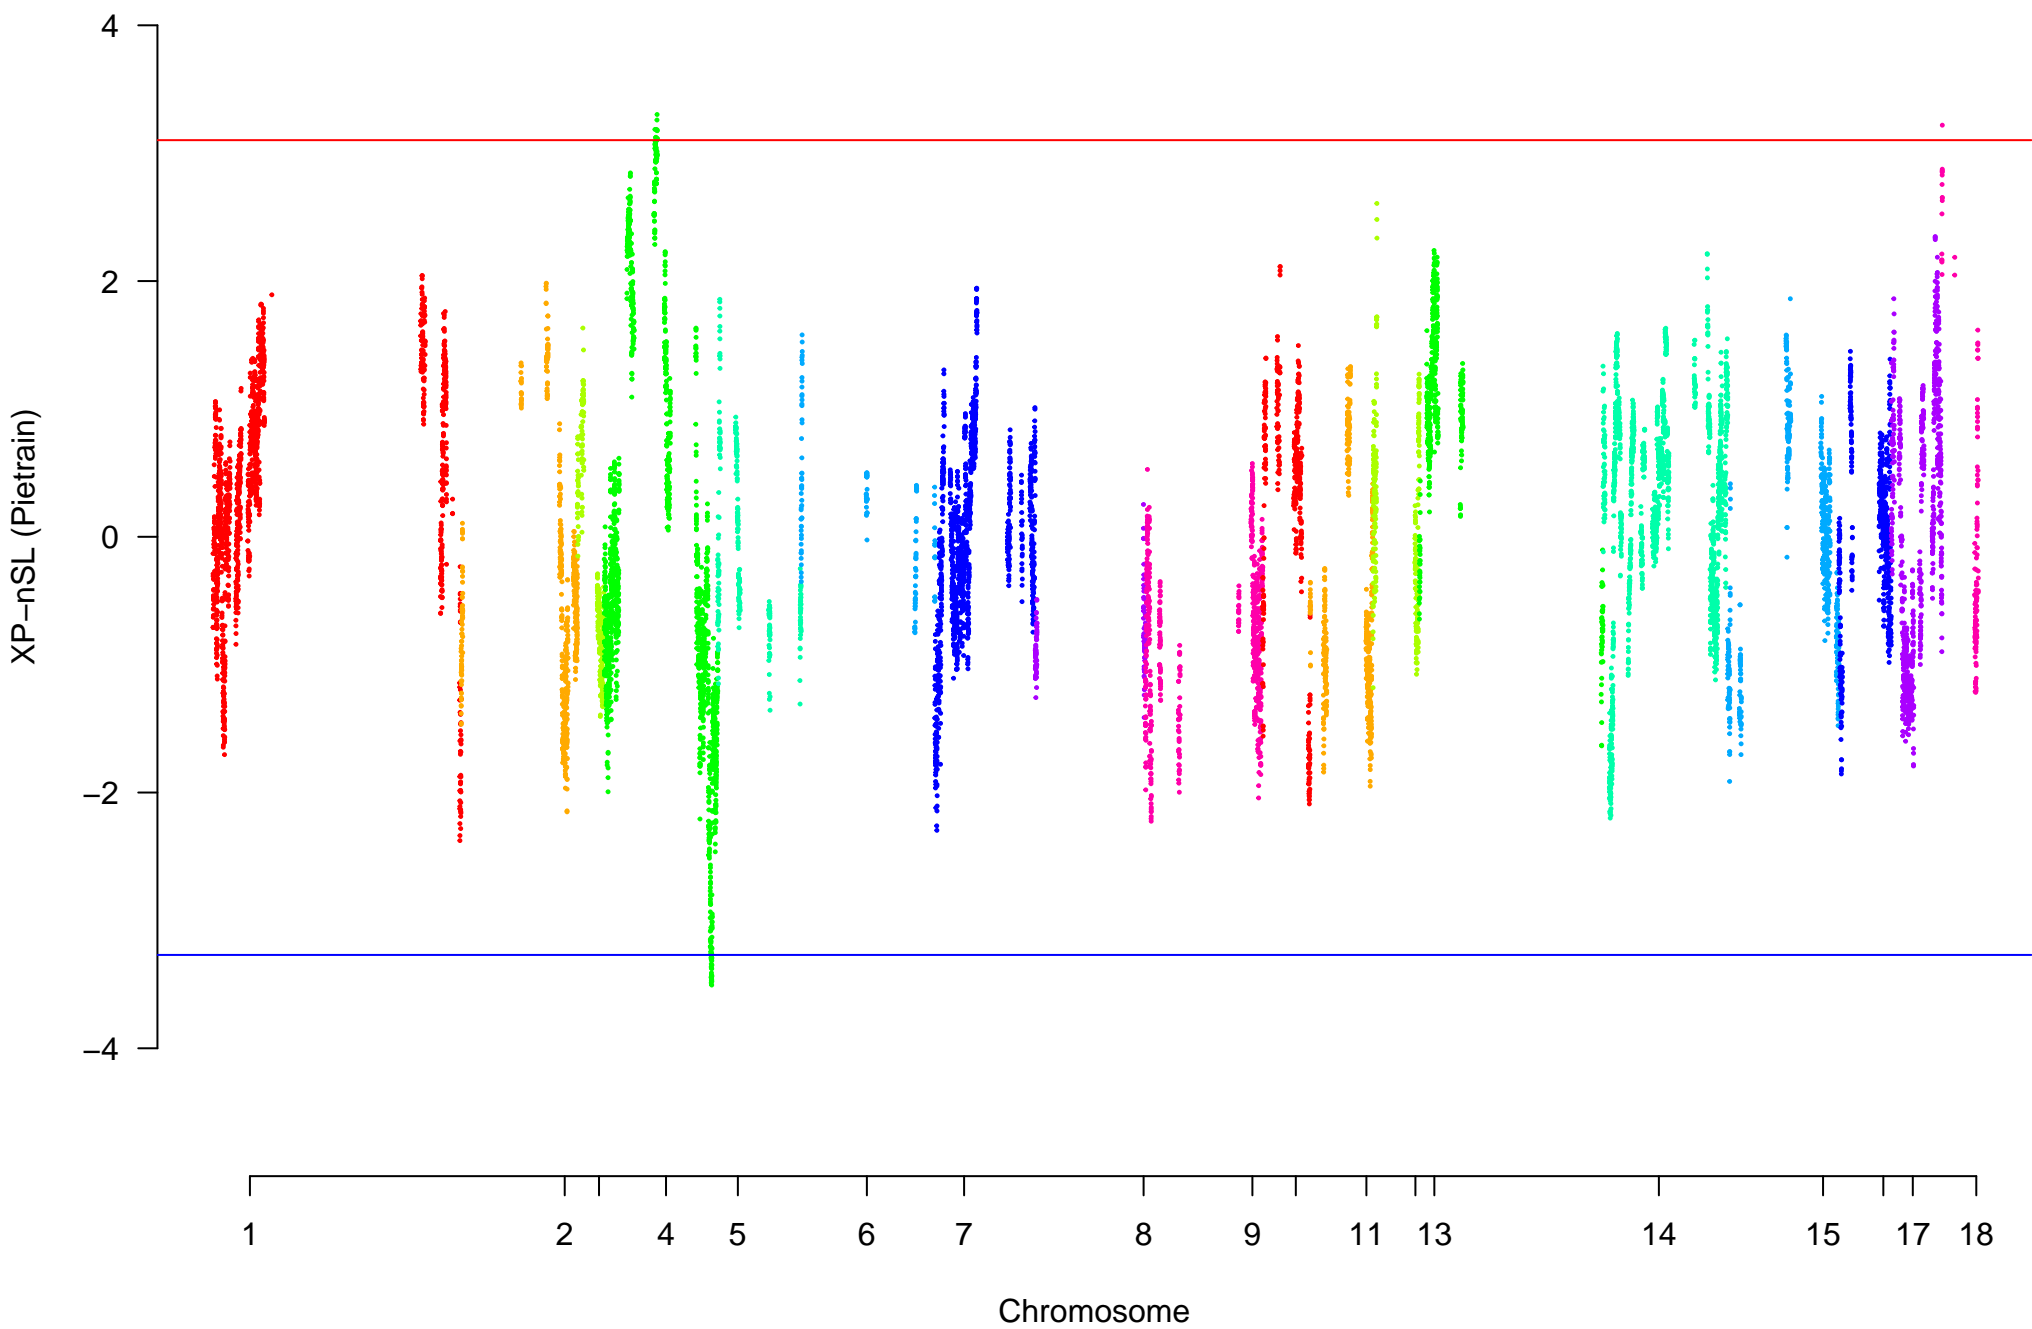

Supplement: Supplementary file 8 [file supplementary]
